# Supplementary material for: Acetylation of PAX7 controls muscle stem cell self-renewal and differentiation potential in mice
Source: PubMed Central journal article supplement (PMC8167170; doi:10.1038/s41467-021-23577-z), 2021-05-31
Supplement: 41467_2021_23577_MOESM2_ESM.pdf [file 41467_2021_23577_MOESM2_ESM.pdf]

## SUPPLEMENTARY INFORMATION

### Acetylation of PAX7 Controls Muscle Stem Cell Self-Renewal and Differentiation Potential in Mice

Marie-Claude Sincennes<sup>1,2</sup>, Caroline E. Brun<sup>1,2</sup>, Alexander Y.T. Lin<sup>1,2</sup>, Tabitha Rosembert<sup>1,2</sup>, David Datzkiw<sup>1,2</sup>, John Saber<sup>1,2</sup>, Hong Ming<sup>1,2</sup>, Yoh-ichi Kawabe<sup>1,2</sup>, Michael A. Rudnicki<sup>1,2\*</sup>

1. Sprott Centre for Stem Cell Research  
Regenerative Medicine Program  
Ottawa Hospital Research Institute  
Ottawa, ON  
K1H 8L6, Canada
2. Department of Cellular and Molecular Medicine  
Faculty of Medicine  
University of Ottawa  
Ottawa, ON  
K1H 8M5, Canada

\* Corresponding Author:  
Email: [mrudnicki@ohri.ca](mailto:mrudnicki@ohri.ca)  
Tel: (613) 739-6740  
Fax: (613) 739-6294

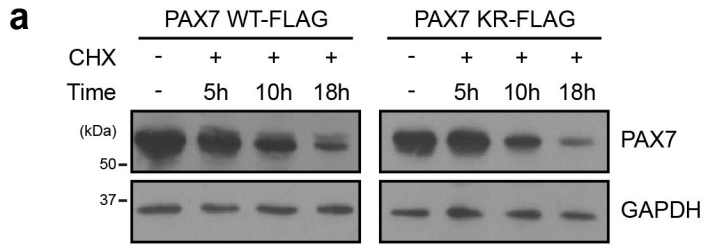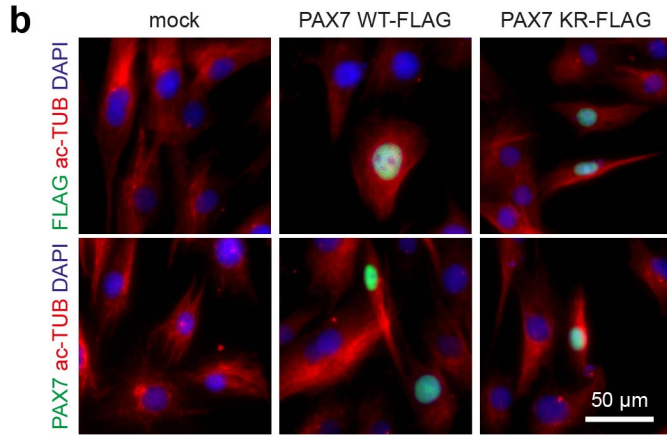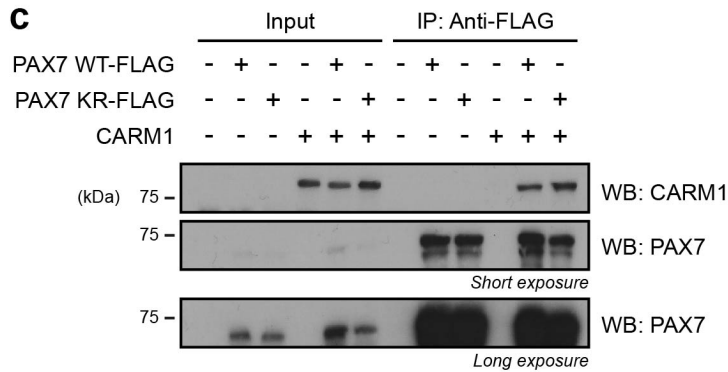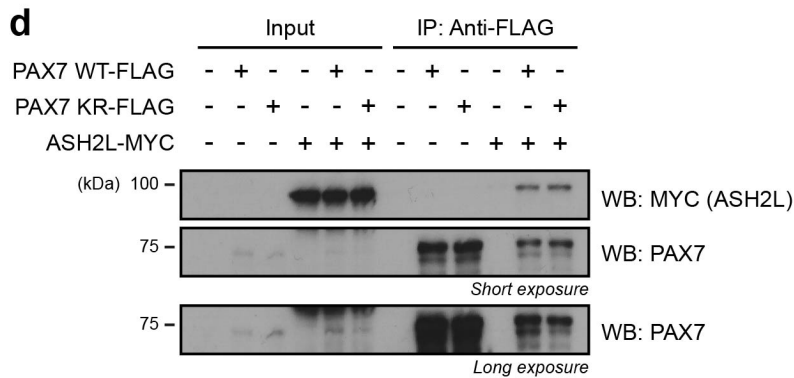

**Supplementary Figure 1. Acetylation of PAX7 does not regulate its protein stability and function, or its nuclear localization**

**a)** C2C12 myoblasts were transfected with plasmids encoding either WT (PAX7 WT-FLAG) or K105/193R PAX7 (PAX7 KR-FLAG). 48h post-transfection, cells were treated with cycloheximide (100 $\mu$ g/ml) for the indicated times. Protein expression was detected by immunoblotting using the indicated antibodies.

**b)** C2C12 myoblasts transfected as in **(a)** were fixed and stained for FLAG (green, upper panel) or PAX7 (green, lower panel) and acetylated  $\alpha$ -TUBULIN (ac-TUB, red), and nuclei were counterstained with DAPI. Scale bar represents 50 $\mu$ m. Images are representative of  $\geq 90\%$  of the cells examined (n = 3 independent experiments).

**c)** Cells were transfected with plasmids encoding FLAG-tagged PAX7 WT or KR, together with MYC-tagged *Carm1* plasmid DNA. The interaction between PAX7 and CARM1 was determined by immunoprecipitation using anti-FLAG antibodies.

**d)** Cells were transfected with plasmids encoding FLAG-tagged PAX7 WT or KR, together with MYC-tagged *Ash2l* plasmid DNA, as indicated. The interaction between PAX7 and ASH2L was determined by immunoprecipitation using anti-FLAG antibodies.

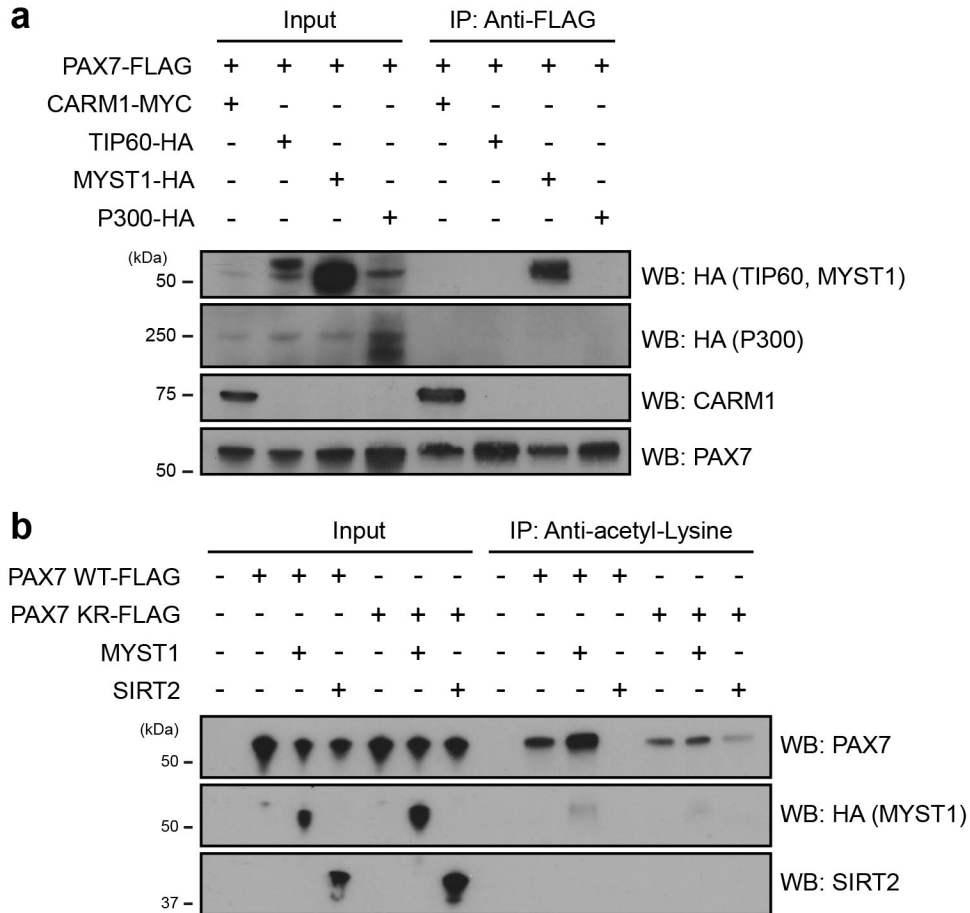

**Supplementary Figure 2. PAX7 specifically interacts with the acetyltransferase MYST1 to regulate its acetylation status**

**a)** C2C12 myoblasts were transfected with plasmids encoding FLAG-PAX7, MYC-CARM1 and the different HA-tagged acetyltransferases (HAT), as indicated. The interaction between PAX7 and the different HATs was determined by immunoprecipitation using anti-FLAG antibodies. CARM1 was used as a positive control for PAX7-interacting protein.

**b)** Cells were transfected with plasmids encoding PAX7 (WT or K105/193R, KR), MYST1 and SIRT2, and lysates were subjected to immunoprecipitation using anti-acetyl-lysine antibodies. Immunoblotting was performed with the indicated antibodies.



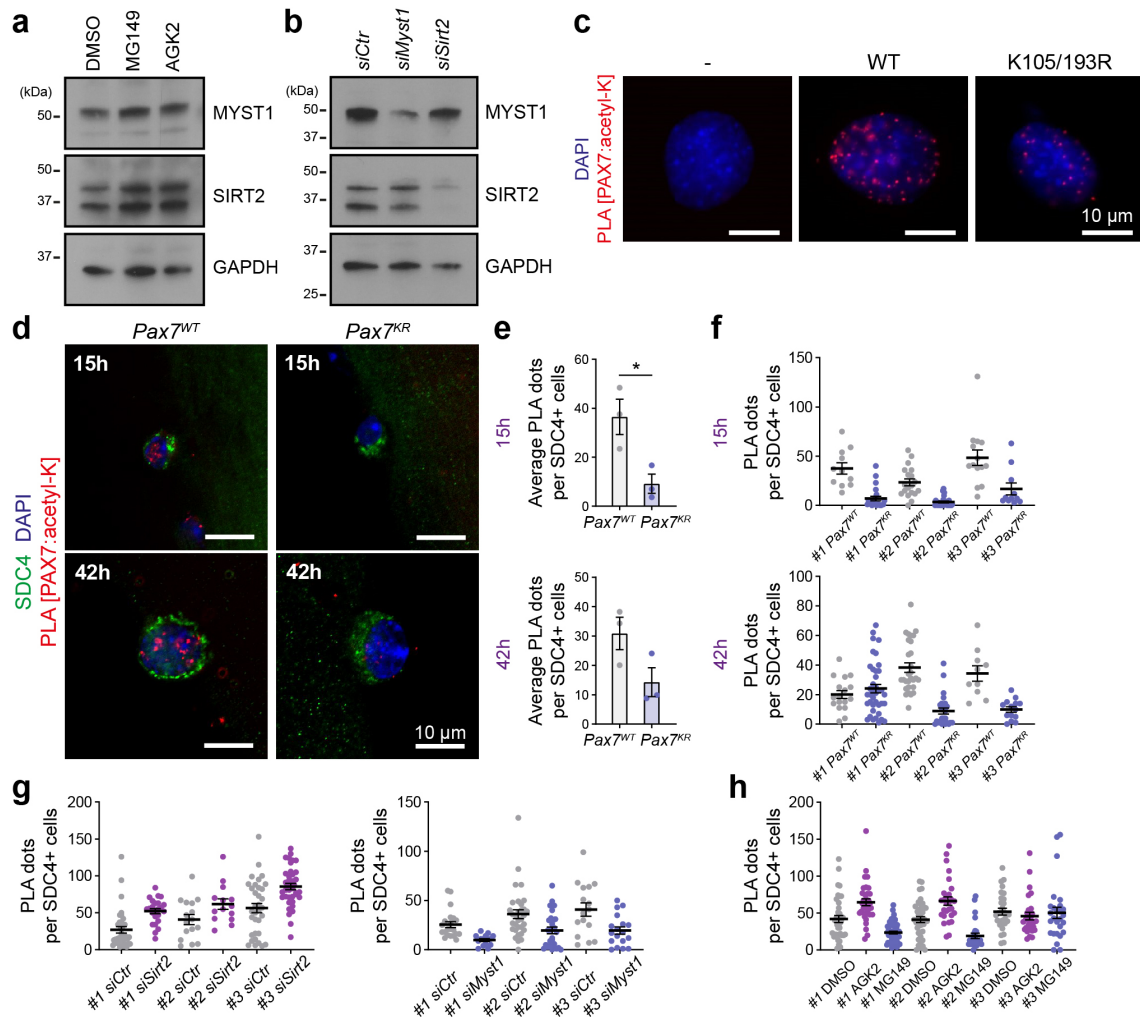

### Supplementary Figure 3. PAX7 is acetylated in satellite cells

**a, b)** Expression level of MYST1 and SIRT2 in primary myoblasts following siRNA and drug treatments. **a)** Primary myoblasts were collected after 24h-treatment with the SIRT2 inhibitor AGK2 (20 $\mu$ M) and the MYST1 inhibitor MG149 (40 $\mu$ M). **b)** Primary myoblasts were transfected twice with siRNAs targeting *Myst1* or *Sirt2*, and collected 24h after the second transfection. Protein expression was detected by immunoblotting using the indicated antibodies, and GAPDH was used as a loading control.

**c)** Representative PAX7:acetylated-lysine PLA (red) performed on C2C12 myoblasts, transfected with plasmids encoding PAX7 (WT or K105/193R, KR) as indicated. Nuclei are counterstained with DAPI (blue). Scale bar represents 10  $\mu\text{m}$ . Images are representative of  $\geq 80\%$  of the cells examined (n = 3 independent experiments).

**d)** Representative PAX7:acetylated-lysine PLA (red) performed on satellite cells from *Pax7<sup>WT</sup>* and *Pax7<sup>KR</sup>* cultured myofibers for the indicated times. Satellite cells are marked by expression of Syndecan-4 (green) and nuclei are counterstained with DAPI (blue). Scale bar represents 10  $\mu\text{m}$ . Images are representative of  $\geq 75\%$  of the myofibers examined (n = 3 mice).

**e)** Quantification of the PLA signals from **d)**, represented as the mean  $\pm$  SEM. Quantification was obtained by counting the number of nuclear PLA puncta for each satellite cell (time 15h: n = 44 *Pax7<sup>WT</sup>*, n = 62 *Pax7<sup>KR</sup>* cells from 3 mice) (time 42h: n = 56 *Pax7<sup>WT</sup>*, n = 79 *Pax7<sup>KR</sup>* cells from 3 mice) (Two-tailed unpaired t test: \*p = 0,0291).

**f-h)** Quantification of PLA signal for each individual cell analyzed in three biological replicates. Data are presented as mean values  $\pm$  SEM **f)** Corresponds to Supplementary Figure 3e; **g)** corresponds to Figure 4 b,c; **h)** corresponds to Figure 4e.

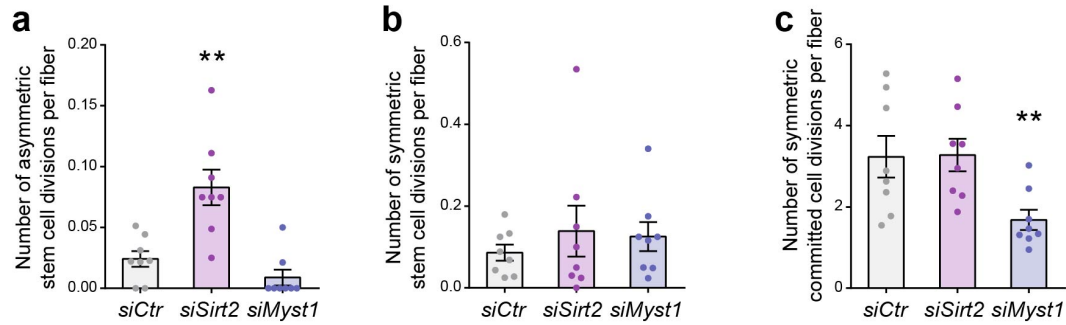

#### Supplementary Figure 4. MYST1 and SIRT2 regulate satellite cell self-renewal

**a, b)** Absolute number of **(a)** asymmetric (YFP<sup>-</sup>/YFP<sup>+</sup>) and **(b)** symmetric (YFP<sup>-</sup>/YFP<sup>-</sup>) satellite stem cell divisions per muscle fiber, after transfection with siRNAs against *Myst1* and *Sirt2*. Data are presented as mean values ± SEM (n = 8 samples from independent mice) (One-way ANOVA uncorrected Fisher's LSD test: \*\*p = 0,0038).

**c)** Absolute number of committed (YFP<sup>+</sup>/YFP<sup>+</sup>) satellite cell divisions per muscle fiber, after *Myst1* and *Sirt2* knockdown. Data are presented as mean values ± SEM (n = 8 samples from independent mice) (One-way ANOVA uncorrected Fisher's LSD test: \*\*p = 0,0033).

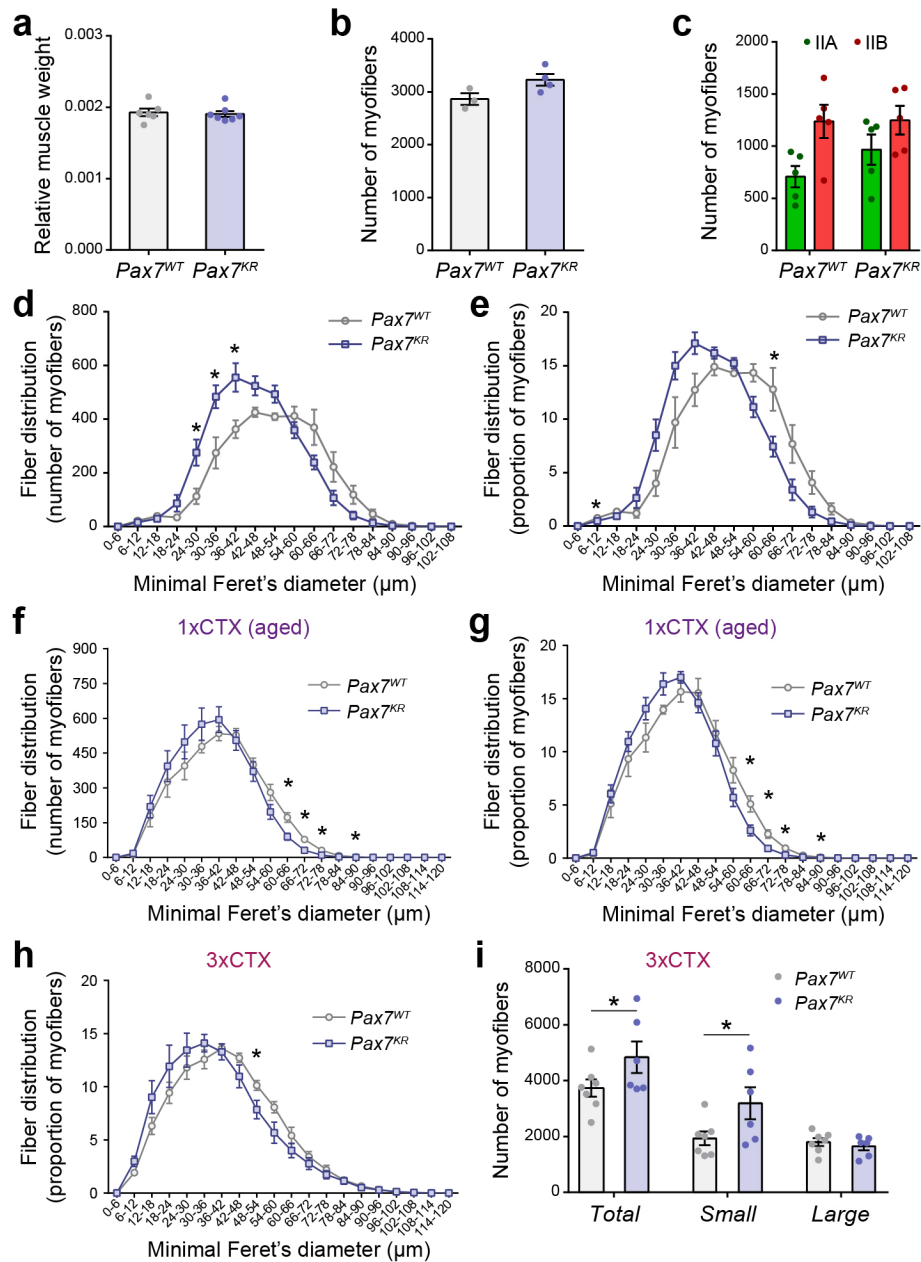

### Supplementary Figure 5. *Pax7<sup>KR</sup>* mice display smaller muscle fibers

**a)** Weight of uninjured TA muscle relative to body weight. Data are presented as mean values  $\pm$  SEM (n = 6 mice per group).

**b)** Number of muscle fibers per uninjured TA muscle. Data are presented as mean values  $\pm$  SEM (n = 3 for *Pax7<sup>WT</sup>* mice, n = 4 for *Pax7<sup>KR</sup>* mice).

**c)** Quantification of the number of type IIA and type IIB muscle fibers in uninjured TA muscles (contralateral leg). Data are presented as mean values  $\pm$  SEM (n = 5 mice per group).

**d, e)** Minimal fiber Feret's diameter distribution of uninjured TA muscle from *Pax7<sup>WT</sup>* and *Pax7<sup>KR</sup>* mice, represented as **(e)** absolute number of muscle fibers or as **(f)** percentage of muscle fibers. Data are presented as mean values  $\pm$  SEM (n = 3 for *Pax7<sup>WT</sup>* mice, n = 4 for *Pax7<sup>KR</sup>* mice) (Multiple unpaired t tests: \*p = 0,048; \*p = 0,031; \*p = 0,037 respectively in **(d)**; \*p = 0,035; \*p = 0,046 respectively in **(e)**).

**f, g)** Minimal fiber Feret's diameter distribution of TA muscle from aged *Pax7<sup>WT</sup>* and *Pax7<sup>KR</sup>* mice, 21 days following one CTX-induced muscle injury, represented as **(f)** absolute number of muscle fibers or as **(g)** percentage of muscle fibers. Data are presented as mean values  $\pm$  SEM (n = 4 for *Pax7<sup>WT</sup>* mice, n = 5 for *Pax7<sup>KR</sup>* mice) (Multiple unpaired t tests: \*p = 0,015; \*p = 0,012; \*p = 0,032; \*p = 0,040 respectively in **(f)**; \*p = 0,024; \*p = 0,015; \*p = 0,041; \*p = 0,036 respectively in **(g)**).

**h)** Minimal fiber Feret's diameter of injured TA muscles from *Pax7<sup>WT</sup>* and *Pax7<sup>KR</sup>* mice after 3 consecutive rounds of CTX injury, represented as percentage of muscle fibers. Data are presented as mean values  $\pm$  SEM (n = 6 mice per group) (Multiple unpaired t tests: \*p = 0,021).

**i)** Number of total, large and small muscle fibers per TA muscle after triple CTX injury. Data are presented as mean values  $\pm$  SEM (n = 6 mice per group) (Two-way ANOVA uncorrected Fisher's LSD test: \*p = 0,0359 in Total; \*p = 0,0186 in Small).

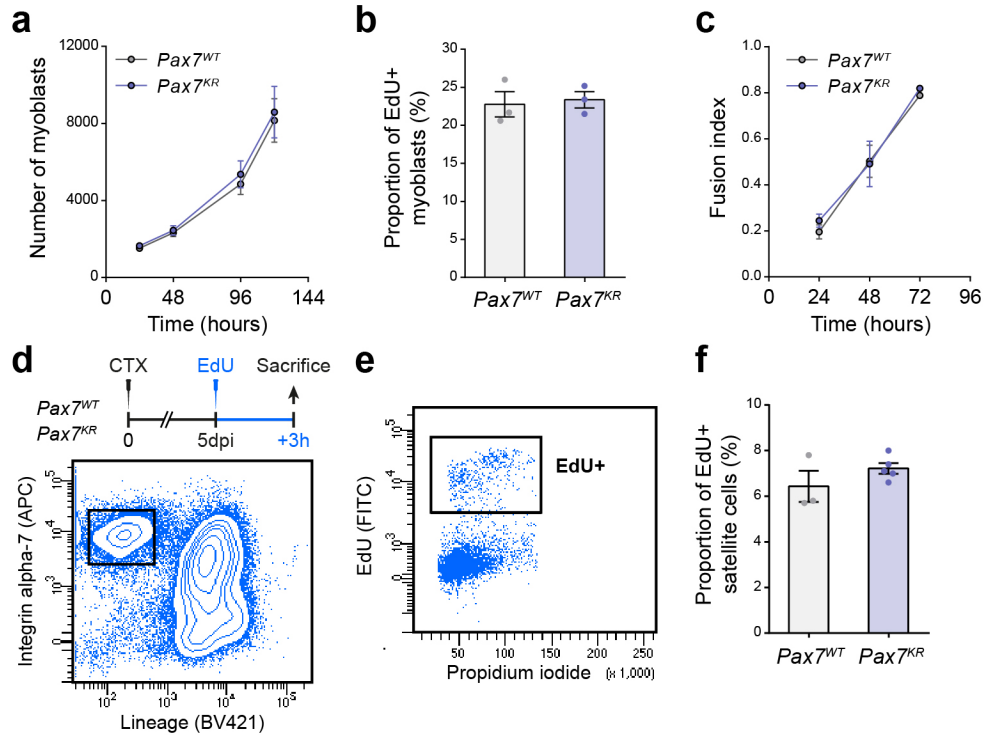

### Supplementary Figure 6. *Pax7<sup>KR</sup>* satellite cells proliferate normally

a) Primary myoblasts were isolated from *Pax7<sup>WT</sup>* and *Pax7<sup>KR</sup>* mice and seeded at time 0 at the same cell concentration. Myoblasts were cultured for 5 days in growth conditions and their numbers were quantified at each indicated time point. Data are presented as mean values  $\pm$  SEM (n = 3 biologically independent samples).

b) Primary myoblasts were treated with EdU for 2h, fixed, and analyzed for EdU incorporation by flow cytometry. Data are presented as mean values  $\pm$  SEM (n = 3 biologically independent samples).

c) Primary myoblasts were plated at high confluency and induced to differentiate for the indicated time points. Myotubes were stained using anti-myosin heavy chain antibody and fusion index was quantified. Data are presented as mean values  $\pm$  SEM (n = 3 biologically independent samples).

**d)** Representative flow cytometry plot of muscle cells at 5 days post-CTX injury. Mice were injected with cardiotoxin in the *tibialis anterior* (TA) muscle to induce satellite cell activation and proliferation. At 5 days post-cardiotoxin (CTX) injury, mice were injected intraperitoneally with EdU and analyzed 3h later. Muscle cells were fixed and analyzed for cell proliferation using EdU content. Satellite cells (CD31<sup>-</sup>, SCA1<sup>-</sup>, CD11b<sup>-</sup>, CD45<sup>-</sup>,  $\alpha$ 7-INTEGRIN<sup>+</sup>) were considered for analysis in panels **e,f**.

**e)** Representative flow cytometry plot of EdU-treated satellite cells. Satellite cells were fixed and stained for EdU (proliferating cells) and propidium iodide (DNA content).

**f)** Quantification of the proportion of EdU-positive satellite cells at 5 days post-CTX injury. Data are presented as mean values  $\pm$  SEM (n = 3 for *Pax7<sup>WT</sup>* mice, n = 5 for *Pax7<sup>KR</sup>* mice).

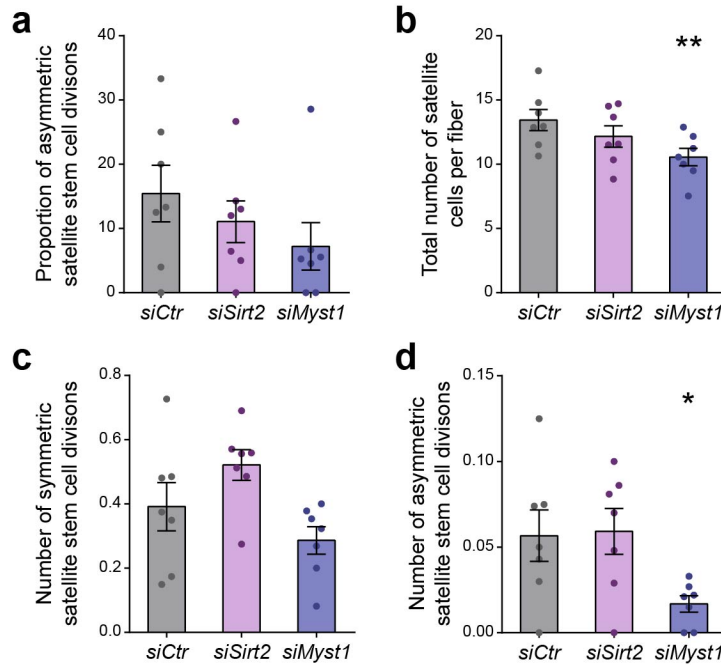

**Supplementary Figure 7. MYST1 and SIRT2 do not regulate satellite cell self-renewal in *Pax7<sup>KR</sup>* mice**

**a)** Proportion of asymmetric satellite stem cell division on *Pax7<sup>KR</sup>:Myf5-Cre:R26R-EYFP* myofibers cultured for 42h. Myofibers were transfected with siRNA against *Sirt2* or *Myst1* as indicated. Data are presented as mean values  $\pm$  SEM (n = 7 samples from independent *Pax7<sup>KR</sup>* mice).

**b)** Number of satellite cells on myofibers cultured for 42h and transfected as in (a). Data are presented as mean values  $\pm$  SEM (n = 7 samples from independent *Pax7<sup>KR</sup>* mice) (One-way ANOVA uncorrected Fisher's LSD test: \*\*p = 0,003).

**c, d)** Absolute numbers of (c) symmetric (YFP-/YFP-) and (d) asymmetric (YFP+/YFP-) satellite cell doublets on myofibers cultured for 42h and transfected as in (a). Data are presented as mean values  $\pm$  SEM (n = 7 samples from independent *Pax7<sup>KR</sup>* mice) (One-way ANOVA uncorrected Fisher's LSD test: \*p = 0,0299).



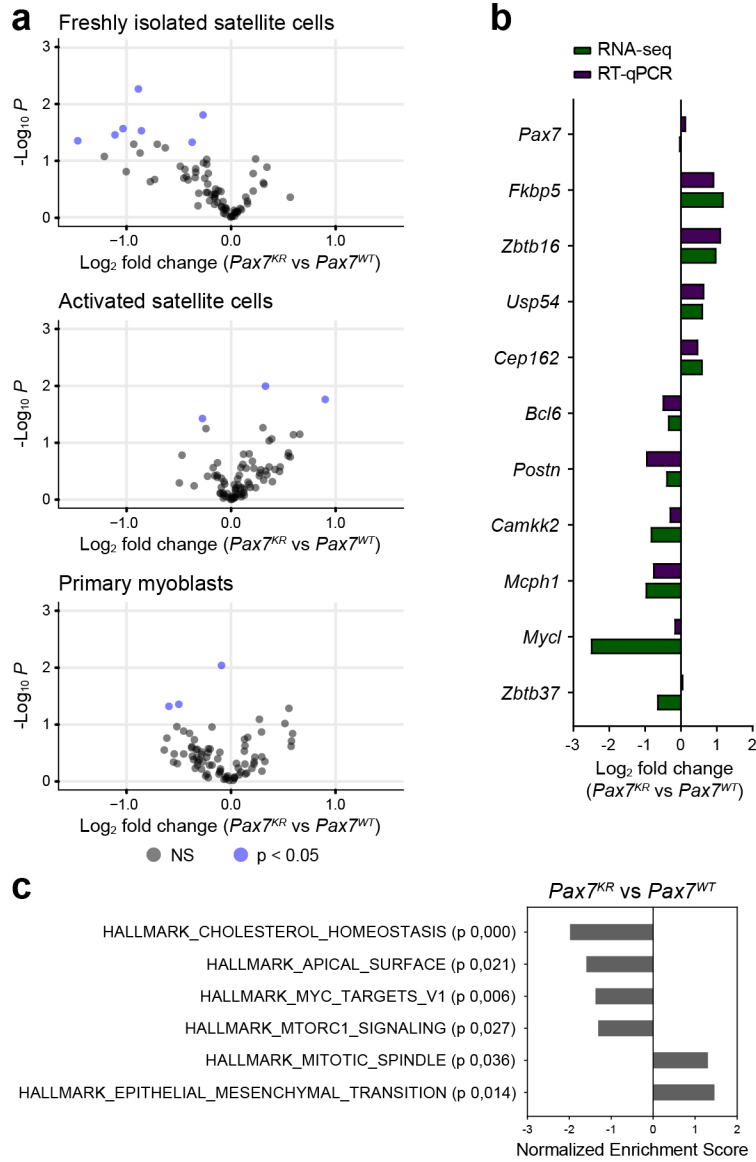

**Supplementary Figure 8. PAX7 acetylation regulates target gene expression in freshly isolated satellite cells**

**a)** Volcano plot representing the difference in gene expression for 80 PAX7 target genes between *Pax7<sup>WT</sup>* and *Pax7<sup>KR</sup>* freshly isolated satellite cells (FISC), activated satellite cells (ASC) and primary myoblasts, determined by Biomark.

**b)** Expression level of differentially expressed genes between *Pax7<sup>WT</sup>* and *Pax7<sup>KR</sup>* satellite cells. Gene expression was determined by RT-qPCR (normalized to *Rps18* expression). Data are presented as log<sub>2</sub>-transformed mean values (n = 4 biologically independent samples for each genotype).

**c)** Summary of Gene set enrichment analysis (GSEA) normalized enrichment scores of *Pax7<sup>KR</sup>* FISCs compared to *Pax7<sup>WT</sup>* FISCs.

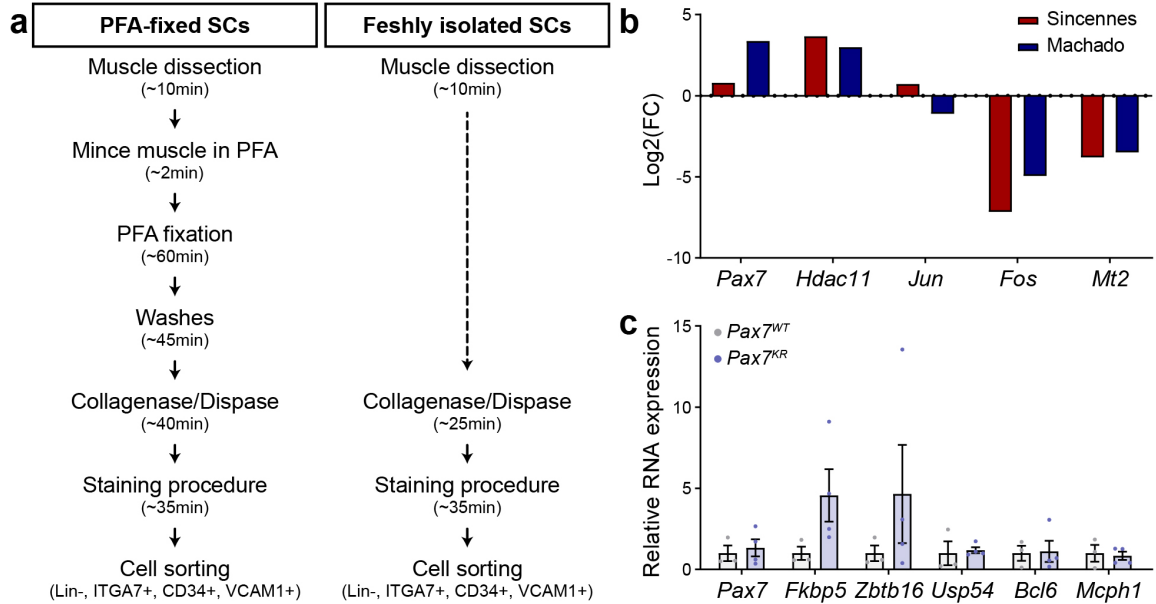

**Supplementary Figure 9. PAX7 acetylation regulates a subset of target genes in quiescent satellite cells**

a) Experimental procedures used to purify freshly isolated satellite cells and quiescent, PFA-fixed satellite cells.

b) Differences in gene expression between freshly isolated (FISCs) and quiescent, PFA-fixed (QSCs) satellite cells. Sincennes, red: gene expression determined by RT-qPCR (n = 6 FISCs, n = 7 QSCs), normalized to *Rps18* expression, and expressed as log<sub>2</sub> fold change (FISCs *versus* QSCs). Machado, blue: gene expression determined by RNA-sequencing<sup>1</sup>, expressed as log<sub>2</sub> fold change (FISCs *versus* QSCs).

c) Gene expression analysis of *Pax7*<sup>WT</sup> and *Pax7*<sup>KR</sup> quiescent, PFA-fixed satellite cells. Gene expression was determined by RT-qPCR (normalized to *Rps18* expression). Data are presented as mean values ± SEM (n = 3 *Pax7*<sup>WT</sup>, n = 4 *Pax7*<sup>KR</sup>).

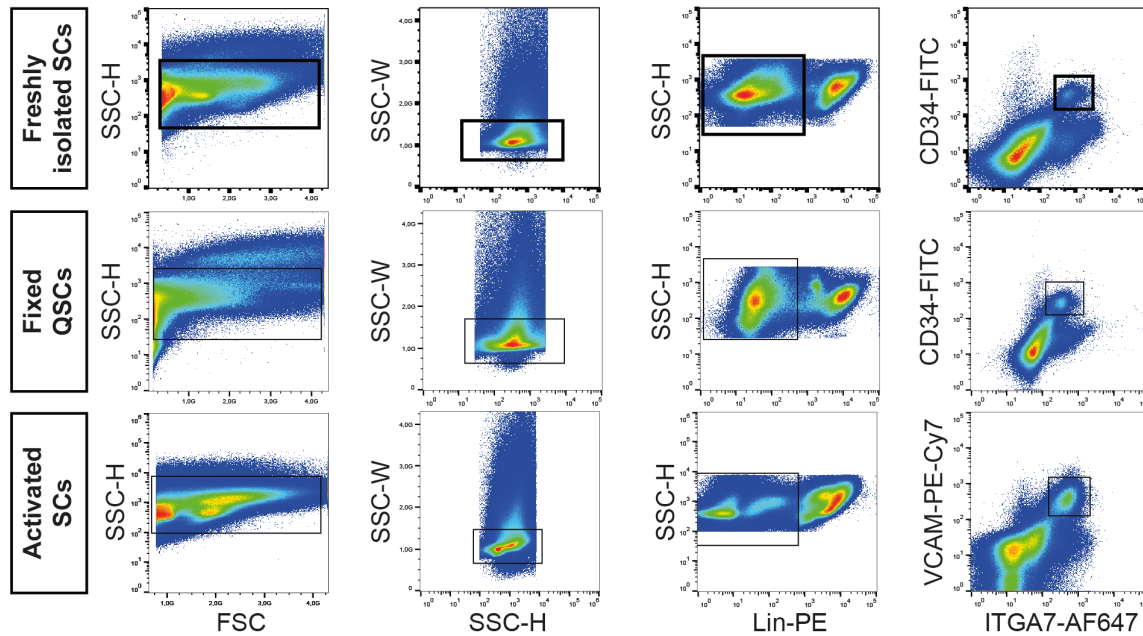

### Supplementary Figure 10. Gating strategy for quiescent and activated satellite cell sort

Freshly isolated and fixed QSCs: Single cell suspensions were obtained from all hindlimb muscles. Cell doublets were excluded from the analysis (SSC-H vs SSC-W). Satellite cells (CD31-, CD45-, SCA1-, CD11b-, ITGA7+, CD34+) were sorted and used for RNA-seq analysis (**Figure 8**), for Biomark analysis (**Supplementary Figure 8a**) as well as for RT-qPCR analyses (**Supplementary Figure 8b**, **Supplementary Figure 9b**).

Activated SCs: Single cell suspensions were obtained from *tibialis anterior* (TA) and *gastrocnemius* (GA) muscles, 3 days post-cardiotoxin injury. Cell doublets are excluded from the analysis (SSC-H vs SSC-W). Satellite cells (CD31-, CD45-, SCA1-, CD11b-, ITGA7+, VCAM1+) were sorted and used for Biomark analysis (**Supplementary Figure 8a**).

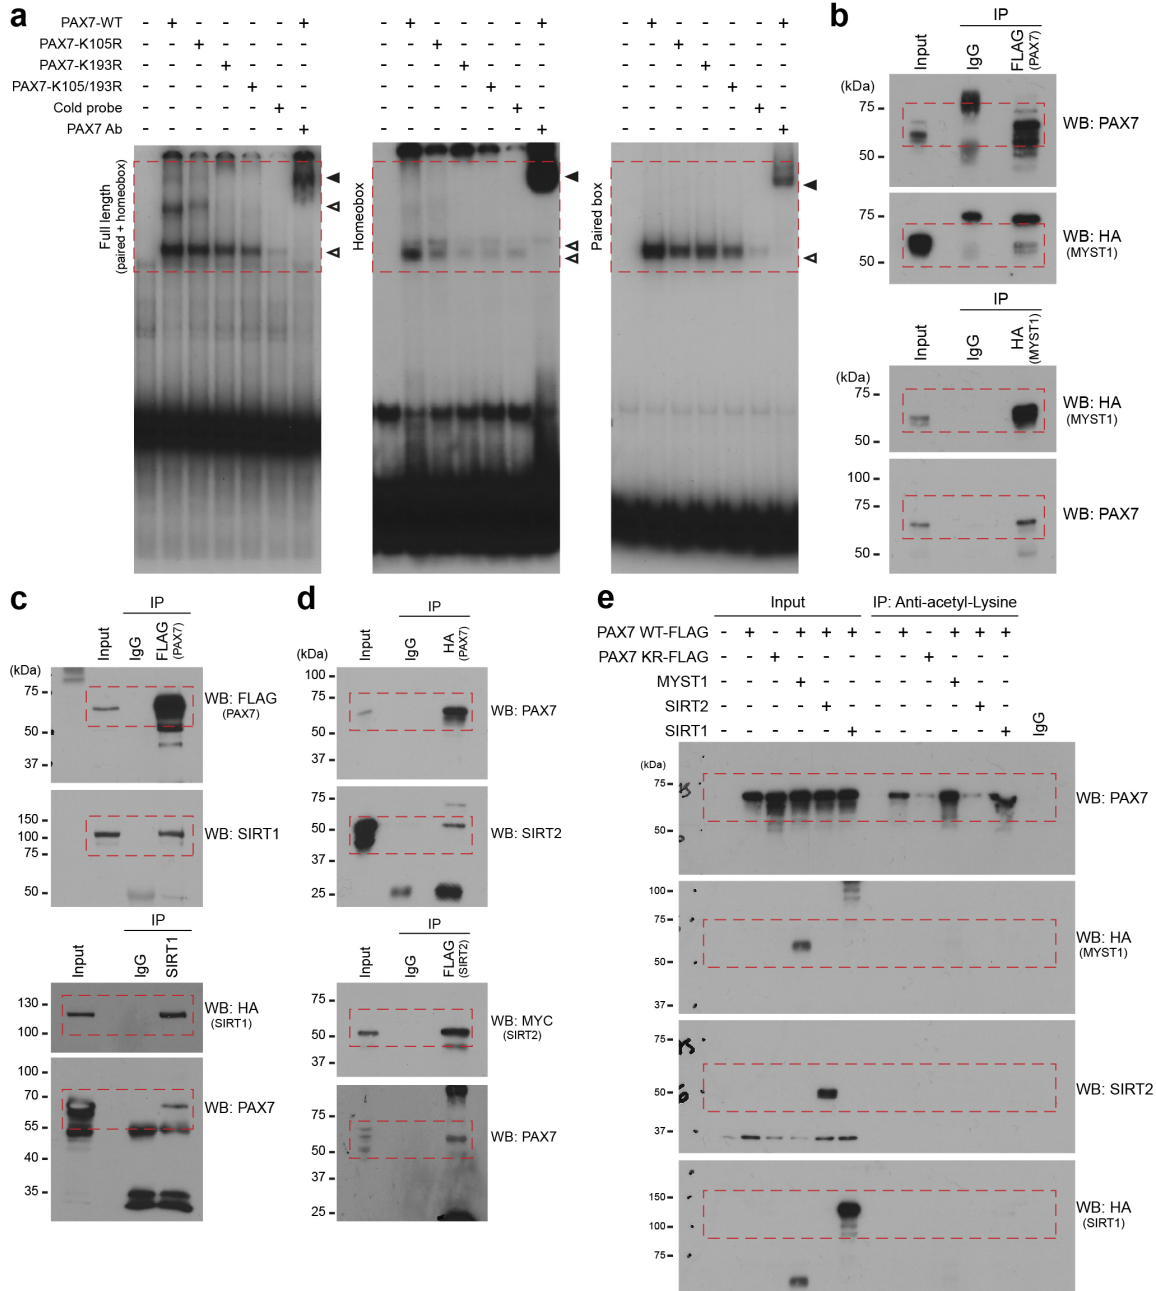

**Supplementary Figure 11. Full scans of immunoblots from main Figures**

a) Figure 1h

b) Figure 2a

c) Figure 2b

d) Figure 2c

e) Figure 2f

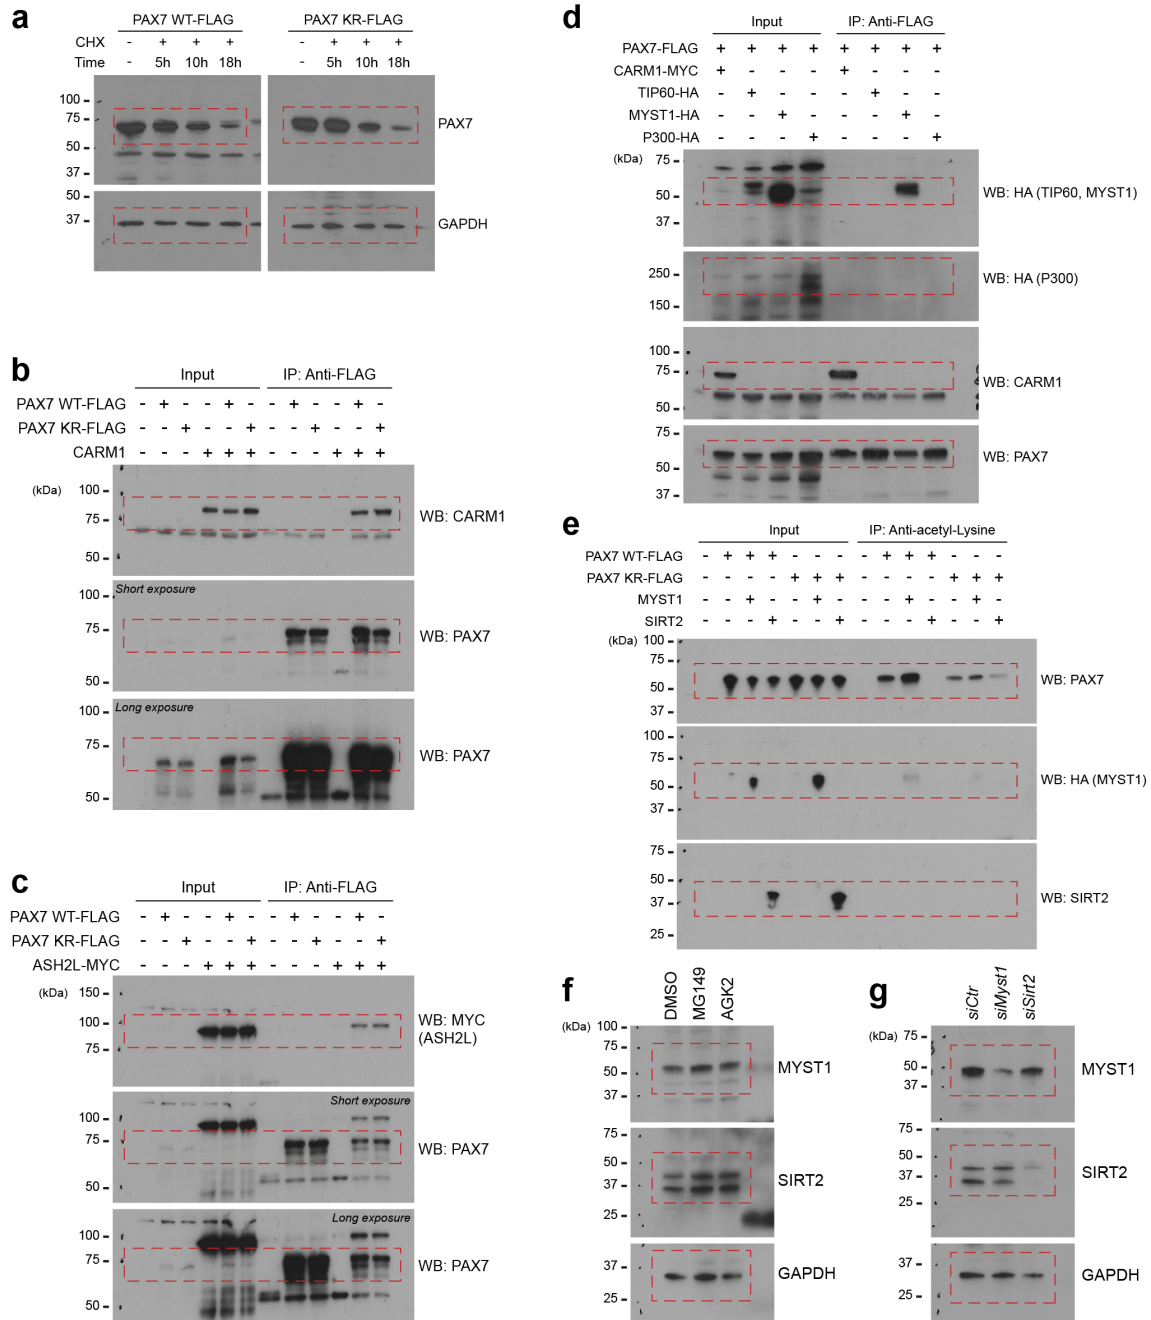

**Supplementary Figure 12. Full scans of immunoblots from Supplementary Figures**

**a)** Supplementary Figure 1a

**b)** Supplementary Figure 1c

**c)** Supplementary Figure 1d

**d)** Supplementary Figure 2a

**e)** Supplementary Figure 2b

**f)** Supplementary Figure 3a

**g)** Supplementary Figure 3b



**Supplementary Table 1. List of primers used**

|                                                               |                       |                                                                                                                                                |
|---------------------------------------------------------------|-----------------------|------------------------------------------------------------------------------------------------------------------------------------------------|
| <b>ChIP</b>                                                   | mMyf5 -111kb ChIP Fw  | CATCCCACATAATCCAATCAC                                                                                                                          |
|                                                               | mMyf5 -111kb ChIP Rv  | ACACAGATGGATGGGAAAGA                                                                                                                           |
|                                                               | mMyf5 -57,5kb ChIP Fw | ATACAGACATGCAGGCTTCACC                                                                                                                         |
|                                                               | mMyf5 -57,5kb ChIP Rv | CTCCGTATGTTTGTGGAAAGG                                                                                                                          |
| <b>RT-qPCR</b>                                                | mRps18 RT-qPCR Fw     | AACGGTCTAGACAACAAGCTG                                                                                                                          |
|                                                               | mRps18 RT-qPCR Rv     | AGTGGTCTTGGTGTGCTGAC                                                                                                                           |
|                                                               | mPax7 RT-qPCR Fw      | GACGACGAGGAAGGAGACAA                                                                                                                           |
|                                                               | mPax7 RT-qPCR Rv      | ACATCTGAGCCCTCATCCAG                                                                                                                           |
|                                                               | mMyst1 RT-qPCR Fw     | GTCACACCTAAGCTGGTAGAG                                                                                                                          |
|                                                               | mMyst1 RT-qPCR Rv     | CAGACAGAGTCCACTGTGATAG                                                                                                                         |
|                                                               | mSirt2 RT-qPCR Fw     | GACTCCAAGAAGGCTTACA                                                                                                                            |
|                                                               | mSirt2 RT-qPCR Rv     | CTGACTGGGCATCTATGTT                                                                                                                            |
|                                                               | mMyf5 RT-qPCR Fw      | TGACGGCATGCCTGAATGTA                                                                                                                           |
|                                                               | mMyf5 RT-qPCR Rv      | ATCTGCAGCACATGCATTTGATA                                                                                                                        |
|                                                               | mFkbp5 RT-qPCR Fw     | GGCAGTCAATCCTCAGAAC                                                                                                                            |
|                                                               | mFkbp5 RT-qPCR Rv     | CTTCTACAGCCTTCTTGCTC                                                                                                                           |
|                                                               | mZbtb16 RT-qPCR Fw    | TAATGGCTGTGGCAAGAAG                                                                                                                            |
|                                                               | mZbtb16 RT-qPCR Rv    | TGATCATGGCCGAGTAGT                                                                                                                             |
|                                                               | mUsp54 RT-qPCR Fw     | CTCCTGTATTTCTCCTTGATCC                                                                                                                         |
|                                                               | mUsp54 RT-qPCR Rv     | CATCCCTGTCACACATAGC                                                                                                                            |
|                                                               | mCep162 RT-qPCR Fw    | GATCAAGCAGATGGAGATGAG                                                                                                                          |
|                                                               | mCep162 RT-qPCR Rv    | TCTACTACTTGGCGTGTTTG                                                                                                                           |
|                                                               | mBcl6 RT-qPCR Fw      | TCATCCACACTGGAGAGAA                                                                                                                            |
|                                                               | mBcl6 RT-qPCR Rv      | GACGAAAGTGCAGGTTACA                                                                                                                            |
|                                                               | mPostn RT-qPCR Fw     | AACCAAGGACCTGAAACACG                                                                                                                           |
|                                                               | mPostn RT-qPCR Rv     | GTGTCAGGACACGGTCAATG                                                                                                                           |
|                                                               | mCamkk2 RT-qPCR Fw    | GACGCTGTACTGCTTTGT                                                                                                                             |
|                                                               | mCamkk2 RT-qPCR Rv    | GCCTGACTCTTGATCTTACTG                                                                                                                          |
|                                                               | mMcph1 RT-qPCR Fw     | TCCAGTACCTGTGAGAGAAA                                                                                                                           |
|                                                               | mMcph1 RT-qPCR Rv     | CATGTGACTTCAAGCCCTAA                                                                                                                           |
|                                                               | mMycl RT-qPCR Fw      | CCTAGTCTGGAAGCCAGTAA                                                                                                                           |
|                                                               | mMycl RT-qPCR Rv      | GTCACCACGTCAATCTCTTC                                                                                                                           |
|                                                               | mHdac11 RT-qPCR Fw    | AGAGGAATGTCAGGAGGT                                                                                                                             |
|                                                               | mHdac11 RT-qPCR Rv    | GTATATCATGGGCTCGGA                                                                                                                             |
|                                                               | mJun RT-qPCR Fw       | GCAACACACAAGTCCAGA                                                                                                                             |
|                                                               | mJun RT-qPCR Rv       | CAGCTTTCAACCAAAGTGTC                                                                                                                           |
|                                                               | mFos RT-qPCR Fw       | GCAAAGTAGAGCAGCTATC                                                                                                                            |
| mFos RT-qPCR Rv                                               | CAACGCAGACTTCTCATC    |                                                                                                                                                |
| mMt2 RT-qPCR Fw                                               | TCTCTCGTCGATCTTCAACC  |                                                                                                                                                |
| mMt2 RT-qPCR Rv                                               | GGAAGCCTCTTTGCAGATG   |                                                                                                                                                |
| <b>Generation of Pax7<sup>KR</sup> mice using CRISPR-Cas9</b> | Pax7_gRNA_K193R       | GGTTCTTACCTTTGTGCGCC                                                                                                                           |
|                                                               | Pax7_hdr_K193R        | AGTTCCGGGAAGAAAGAGGACGACGAGG<br>AAGGAGACAAGAAAGAAGATGGC<br>GAGAAGAAAGCCAAACACAGCATCGAT<br>GGCATtCTGGGCGACcgAGGTAAGAACCT<br>ACCGTGGCCCCGAGACGCC |

|                                             |                          |                                                                              |
|---------------------------------------------|--------------------------|------------------------------------------------------------------------------|
| <b>Genotyping of Pax7<sup>KR</sup> mice</b> | Pax7 R193 MT Geno Fw     | CCACGGTAGGTTCTTACCTCG                                                        |
|                                             | Pax7 K193 WT Geno Rv     | GGCATCCTGGGCGACAA                                                            |
|                                             | Pax7 KR Geno Fw          | TCGGCGATCTGCGACTTTT                                                          |
|                                             | Pax7 KR Geno Rv          | CCAGGAGTGAGCCAGGTTTC                                                         |
| <b>EMSA</b>                                 | Myf5 -111 EMSA full Fw   | GTTTTACAATAATGCATTTTCTGTA<br>ACTAACAACCATCATTTCCTGATTGTCATGC<br>TTCTATCCTTG  |
|                                             | Myf5 -111 EMSA full Rv   | CAAGGATAGAAGCATGACAATCAGGAA<br>ATGATGGTTGTTAGTTACAGAAAATGCA<br>TTATTGTGAAAAC |
|                                             | Myf5 -111 paired EMSA Fw | TCATTTCTGATTGTCATGCTTCTATCCT<br>TGCACA                                       |
|                                             | Myf5 -111 paired EMSA Rv | TGTGCAAGGATAGAAGCATGACAATCA<br>GGAAATGA                                      |
|                                             | Myf5 -111 hbox EMSA Fw   | CTGGTTTTACAATAATGCATTTTCTGTA<br>ACTAAC                                       |
|                                             | Myf5 -111 hbox EMSA Rv   | GTTAGTTACAGAAAATGCATTATTGTGA<br>AAACCAG                                      |

**Supplementary Table 2. List of antibodies used**

| <b>Antibody</b>                                                     | <b>Company</b>              | <b>Reference</b> |
|---------------------------------------------------------------------|-----------------------------|------------------|
| Mouse monoclonal anti-Flag M2                                       | Sigma-Aldrich               | F3165            |
| Rabbit polyclonal anti-c-Myc                                        | Bethyl Laboratories         | A190-105A        |
| Rabbit anti-HA                                                      | Bethyl Laboratories         | A190-108A        |
| Rabbit anti-acetylated lysine                                       | Abcam                       | ab80178          |
| Rabbit anti-acetylated lysine                                       | Cell Signaling Technologies | 9441S            |
| Mouse monoclonal anti-Gapdh                                         | UBC Ablab                   | 21-0017-16       |
| Mouse monoclonal anti-alpha tubulin                                 | Sigma-Aldrich               | T9026            |
| Rabbit polyclonal anti-Sirt1                                        | EMD Millipore               | 07-131           |
| Rabbit anti-Carm1                                                   | Bethyl Laboratories         | A300-421A        |
| Mouse monoclonal anti-Pax7                                          | DSHB                        | N/A              |
| Mouse monoclonal anti-Pax7                                          | Santa Cruz Biotechnology    | sc-81648         |
| Chicken monoclonal anti-Myh1 (MF20)                                 | DSHB                        | N/A              |
| Rabbit polyclonal anti-Sirt2                                        | St John's Labs              | STJ95668         |
| Rabbit polyclonal anti-Myst1                                        | Bethyl Laboratories         | A300-992A        |
| Chicken anti-Syndecan-4                                             | Brad Olwin's laboratory     |                  |
| Chicken polyclonal anti-GFP                                         | Abcam                       | ab13970          |
| Rabbit anti-Dystrophin                                              | Abcam                       | Ab15277          |
| Rat monoclonal anti-Laminin-2                                       | Sigma-Aldrich               | L0663            |
| Mouse monoclonal anti-Acetylated alpha-tubulin                      | Abcam                       | ab24610          |
| Rat anti-alpha-7-integrin (clone R2F2) (Alexa Fluor 647-conjugated) | UBC Ablab                   | R2F2             |
| Rat anti-CD31 (BV421-conjugated)                                    | BD Biosciences              | 562939           |
| Rat anti-CD45 (BV421-conjugated)                                    | BD Biosciences              | 563890           |
| Rat anti-CD11b (BV421-conjugated)                                   | BD Biosciences              | 562605           |
| Rat anti-Ly6A/E (Sca-1) (BV421-conjugated)                          | BD Biosciences              | 562729           |

|                                            |                  |             |
|--------------------------------------------|------------------|-------------|
| Rat anti-CD34 (biotin-conjugated)          | Miltenyi Biotech | 130-105-830 |
| Streptavidin-Pe-Cy7                        | BD Biosciences   | 557598      |
| Rat anti-CD106 (Vcam1) (Pe-Cy7 conjugated) | Biolegend        | 105719      |

### Supplementary References

1. Machado, L. *et al.* In Situ Fixation Redefines Quiescence and Early Activation of Skeletal Muscle Stem Cells. *Cell Rep* **21**, 1982-1993 (2017).
